# Supplementary material for: Pathogen Challenge and Dietary Shift Alter Microbiota Composition and Activity in a Mucin-Associated in vitro Model of the Piglet Colon (MPigut-IVM) Simulating Weaning Transition
Source: PubMed Central journal article supplement (PMC8328230; doi:10.3389/fmicb.2021.703421), 2021-07-19

**A**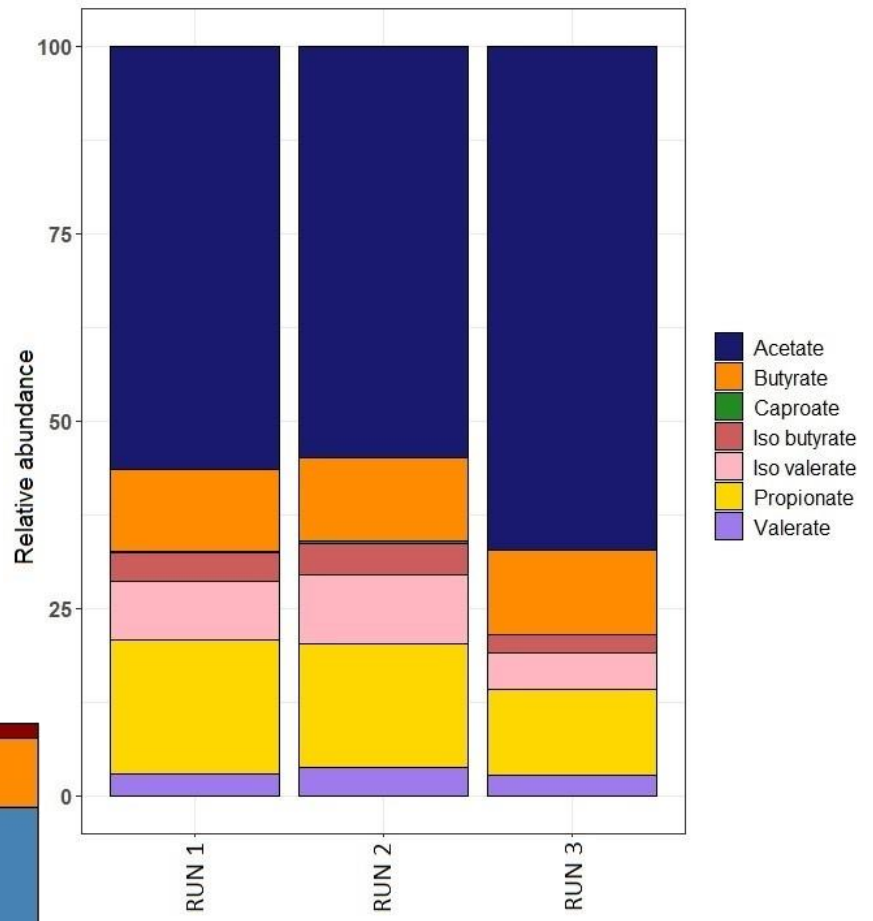**B**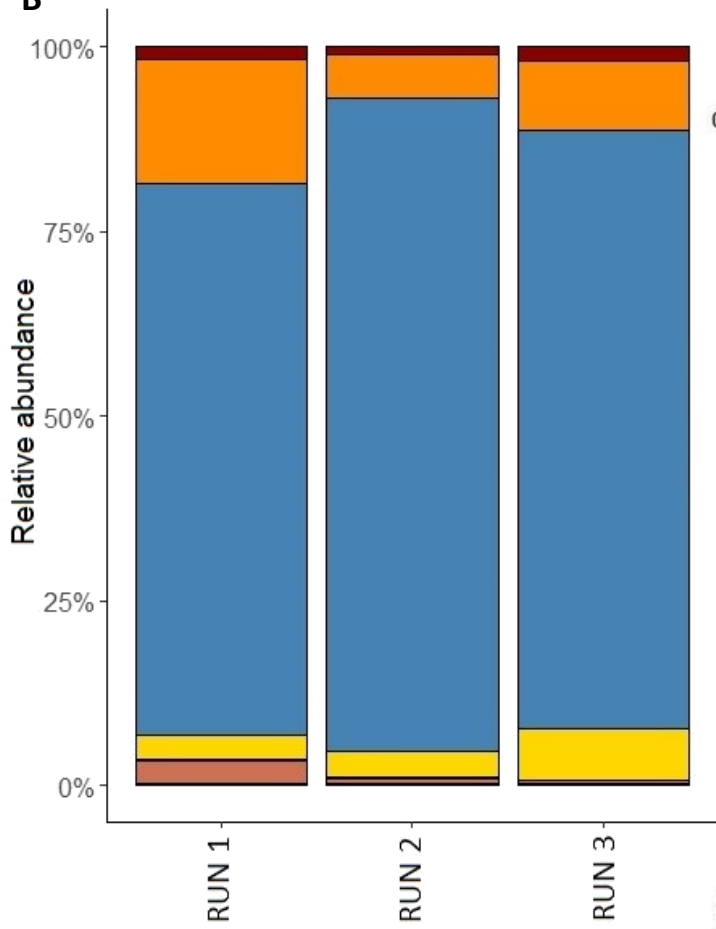**C**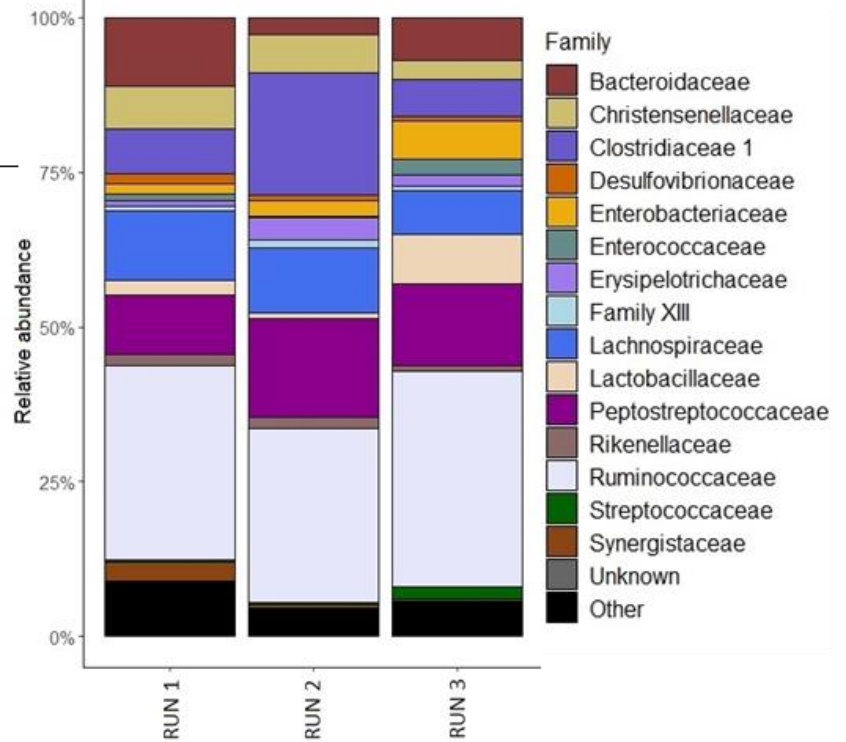

Supplement: Image_1.pdf [file Image_1.pdf]
